# Supplementary material for: Diaphragm echodensity in mechanically ventilated patients: a description of technique and outcomes
Source: Springer Nature journal article supplement (doi:10.1186/s13054-021-03494-9), 2021-02-16

**A**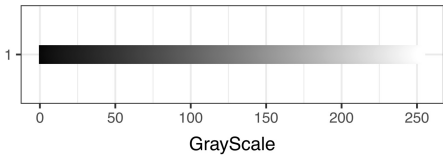**B**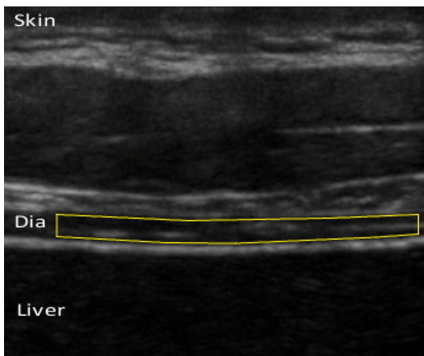**C**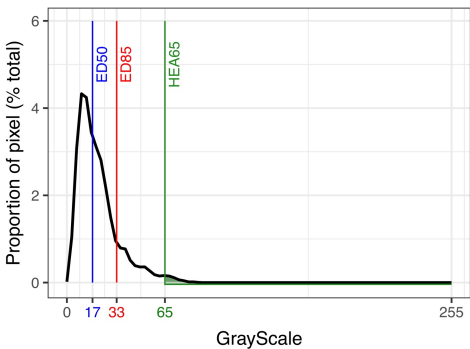

Supplement: MOESM1 [file 18865656]
