# Supplementary material for: Diaphragm echodensity in mechanically ventilated patients: a description of technique and outcomes
Source: Springer Nature journal article supplement (doi:10.1186/s13054-021-03494-9), 2021-02-16
Supplement: MOESM5 [file 18865656]

ED50

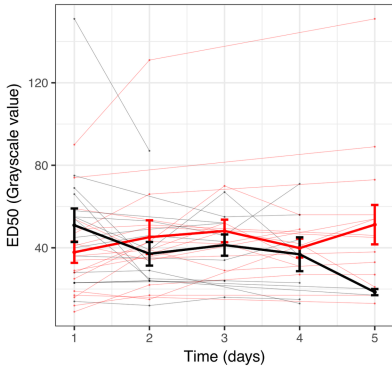

ED85

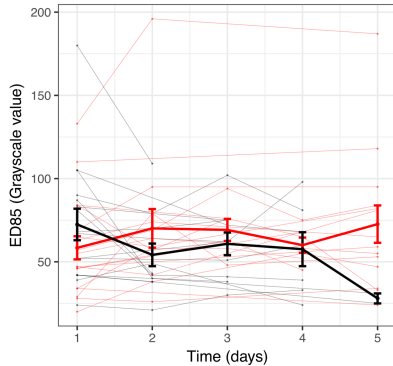

HEA65

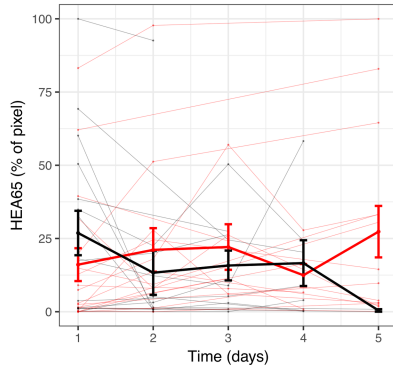

Duration of MV

- >7days (n=18)
- ≤7days (n=16)
